# Supplementary material for: Glycerol Electro-Oxidation in Alkaline Medium with Pt-Fe/C Electrocatalysts Synthesized by the Polyol Method: Increased Selectivity and Activity Provided by Less Expensive Catalysts
Source: MDPI journal article supplement (doi:10.3390/nano13071173), 2023-03-25
Supplement: s1 [file s1]

## Supplementary Information

### Methodology to calculate the mass of platinum in the electrodes

The platinum mass ( $m_{Pt}$ ), in mg, was calculated with the proportions obtained in the EDS and TGA analyses. The  $m_{Pt}$  values were obtained using the equation:

$$m_{Pt} = \frac{m_{cat}}{(f_{M:C}) \times (f_{M1:M2})}$$

$m_{cat}$  = total mass used to prepare ink, in eppendorf;

$f_{M1:M2}$  = mass ratio between Pt and Fe, provided by EDS analysis;

$f_{M:C}$  = proportion of mass between metal and carbon, data taken from TGA analyses;

**Error! Reference source not found.** presents an example of  $m_{cat}$  and  $m_{Pt}$  values.

**Table S1.** Examples of data for ink preparation of vitreous carbon electrodes, in an eppendorf containing 100 mL of isopropyl alcohol (95%) / Nafion (5%) solution.

| Composition of the Synthesis                 | $m_{cat}$ (mg) | $f_{Pt:Fe}$ | $f_{M:C}$ | Volume deposited ( L ) | Mass of Pt ( g ) |
|----------------------------------------------|----------------|-------------|-----------|------------------------|------------------|
| Pt/C                                         | 2.35           | 1           | 0.20      | 5.0                    | 23.5             |
| Pt <sub>95</sub> Fe <sub>05</sub> /C         | 2.40           | 0.95        | 0.13      |                        | 14.8             |
| Pt <sub>75</sub> Fe <sub>25</sub> /C-hydraz. | 2.15           | 0.75        | 0.06      |                        | 4.8              |

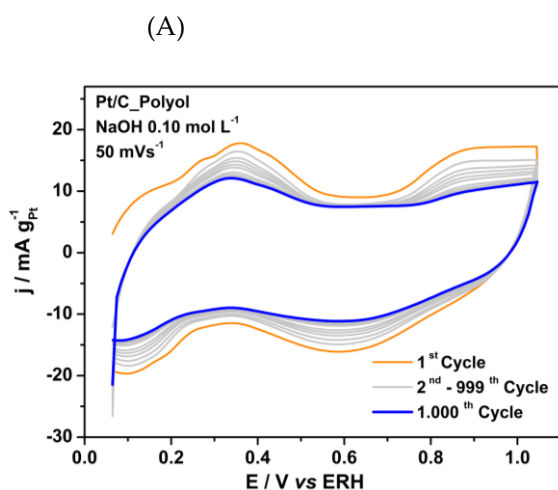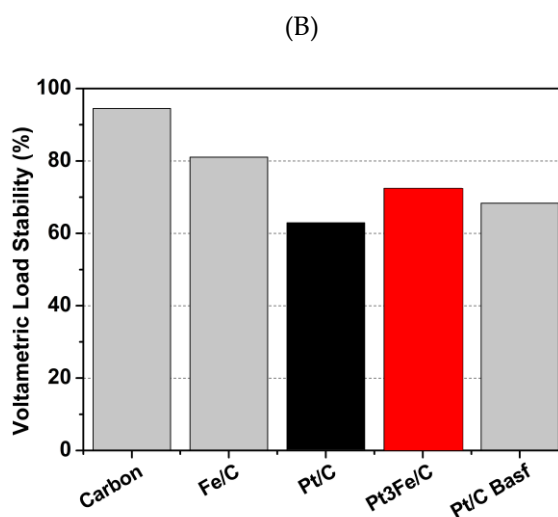

**Figure S1.** Stability test (A) and % voltammetric stability (B). Cycles 1000, 50 mVs<sup>-1</sup>, supporting electrolyte NaOH 0.1 mol L<sup>-1</sup>.
